# Supplementary material for: Clinicopathologic Characteristics and Prognosis of ERBB2-Low Breast Cancer Among Patients in the National Cancer Database
Source: PubMed Central journal article supplement (PMC9951099; doi:10.1001/jamaoncol.2022.7476), 2023-02-23
Supplement: jamaoncol-e227476-s001.pdf [file jamaoncol-e227476-s001.pdf]

## Supplementary Online Content

Peiffer DS, Zhao F, Chen N, et al. Clinicopathologic characteristics and prognosis of ERBB2-low breast cancer among patients in the National Cancer Database. *JAMA Oncol*. Published online February 23, 2023. doi:10.1001/jamaoncol.2022.7476

**eFigure 1.** CONSORT Diagram for Included Patients

**eFigure 2.** ERBB2-Low Status by ER Expression and PR Expression

**eFigure 3.** Density Plots of ERBB2/CEP17 Ratio and ERBB2 Copy Number for ERBB2-Low and ERBB2-Negative Cancers

**eTable 1.** Baseline Patient Demographics and Clinicopathologic Characteristics per ERBB2 Immunohistochemistry Results

**eTable 2.** Sites of Metastatic Disease in ERBB2-Negative Versus ERBB2-Low cancers

**eTable 3.** Baseline Patient Demographics and Clinicopathologic Characteristics of Patients Treated With Neoadjuvant Chemotherapy

**eTable 4.** Overall Survival Versus ERBB2 Immunohistochemistry Results, by Cancer Subtype and Stage

**eTable 5.** Sensitivity and Specificity for Prediction of ERBB2-Low Status Using Select Cutoffs for ERBB2 ISH Results

This supplementary material has been provided by the authors to give readers additional information about their work.

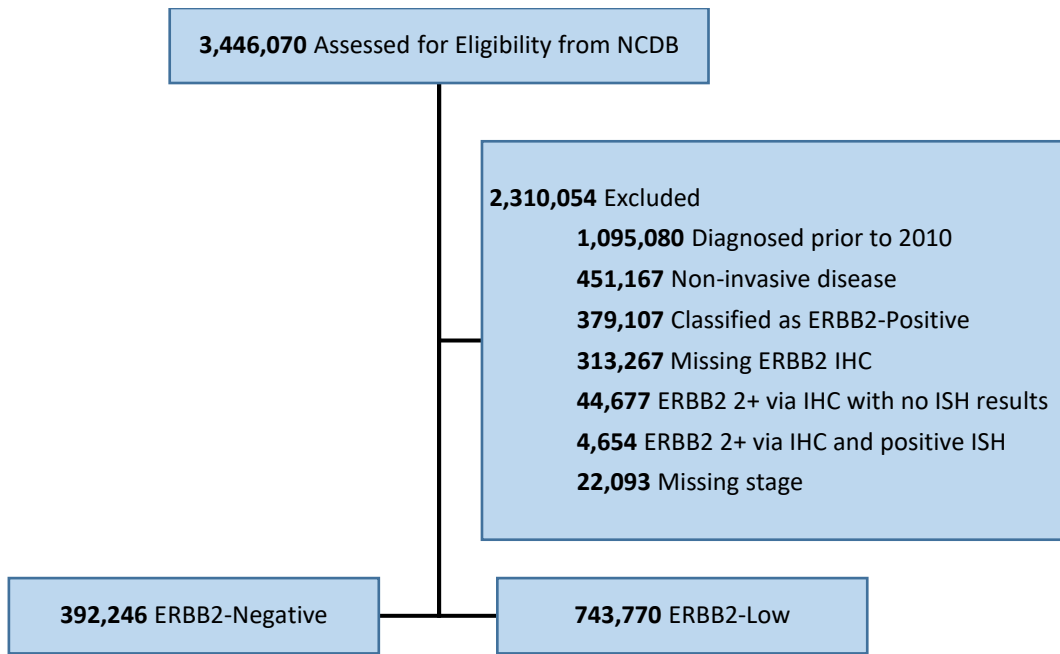

**eFigure 1. CONSORT Diagram for Included Patients.** Abbreviations: NCDB = National Cancer Database. ERBB2 = erb-b2 receptor tyrosine kinase 2. IHC = Immunohistochemistry. ISH = in situ hybridization.

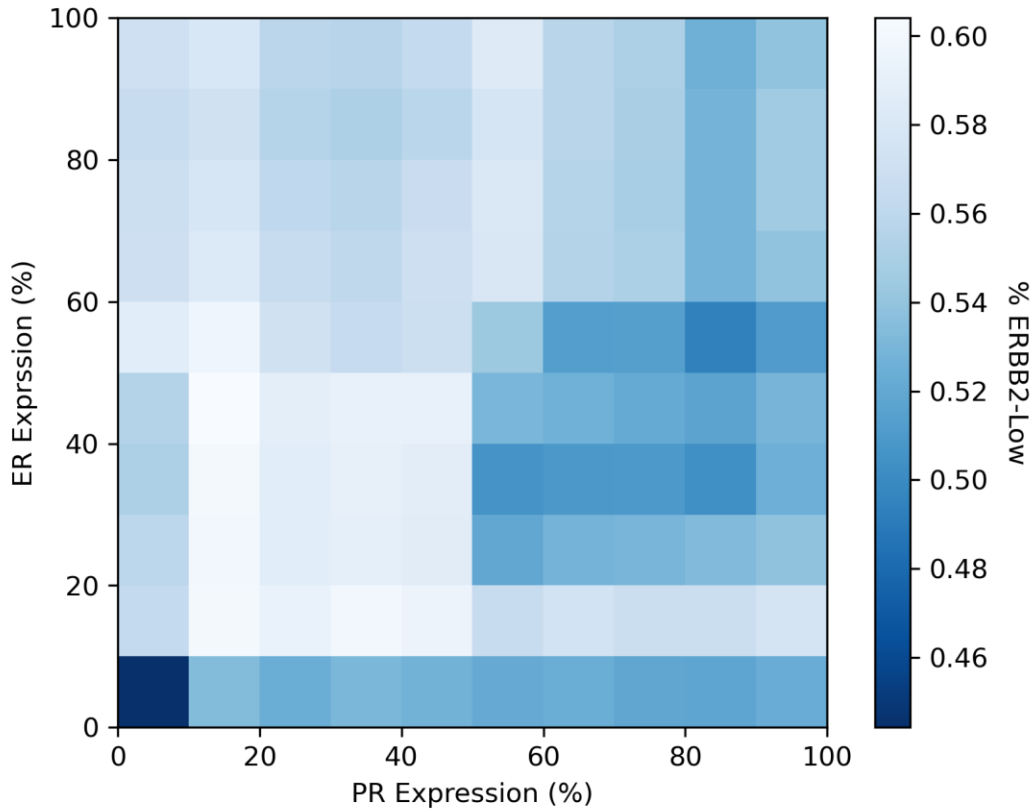

**eFigure 2. ERBB2-Low Status by ER Expression and PR Expression.** Results from 274,716 patients with percentage ER and PR expression available. Patients with weak ER expression demonstrate a decrease in rates of ERBB2-low disease when PR expression is strong (bottom right) as opposed to weak (bottom left). Abbreviations: ERBB2 = erb-b2 receptor tyrosine kinase 2. ER = estrogen receptor. PR = progesterone receptor.

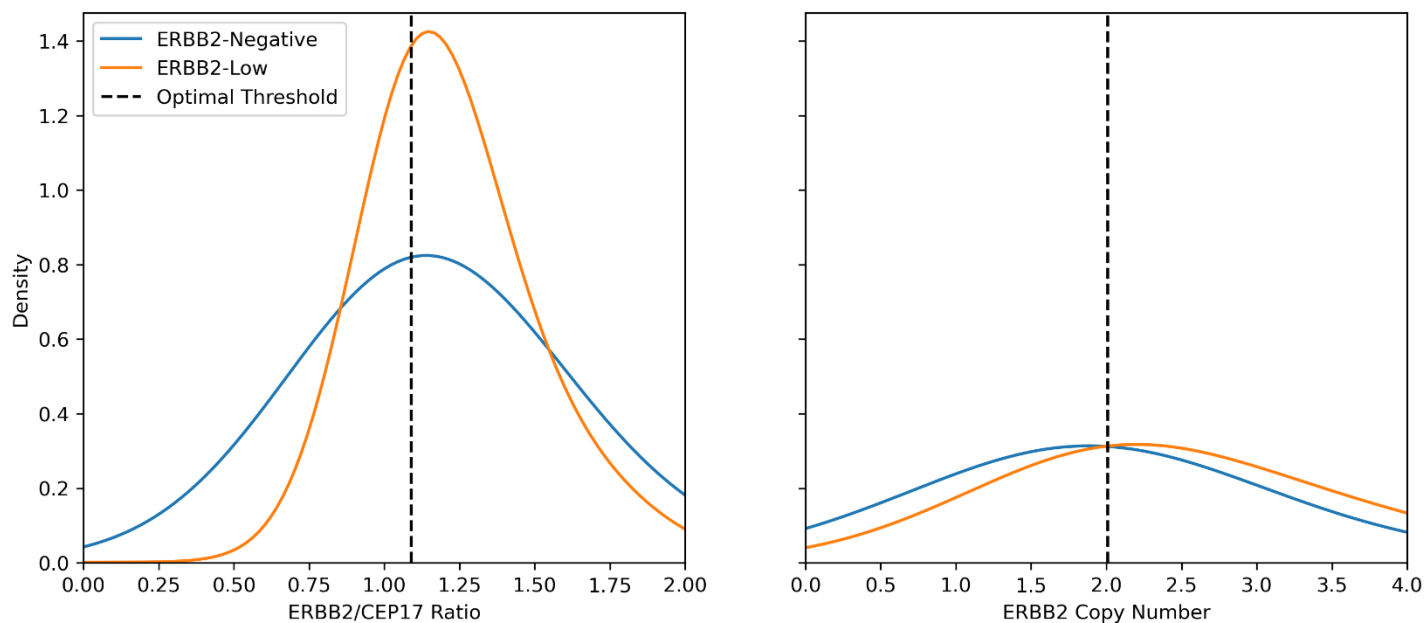

**eFigure 3. Density Plots of ERBB2/CEP17 Ratio and ERBB2 Copy Number for ERBB2-Low and ERBB2-Negative Cancers.** A total of  $n = 74,035$  patients had dual probe ERBB2/CEP17 ratio results (**left**), and a threshold ratio of 1.09 optimized Youden's index, achieving a sensitivity of 77% and specificity of 37% for ERBB2-low disease. Similarly,  $n = 99,541$  had ERBB2 copy number results (**right**), and a threshold of 2.01 had a sensitivity of 61% and specificity of 58% for identifying ERBB2-low disease. Abbreviations: ERBB2 = erb-b2 receptor tyrosine kinase 2.

**eTable 1. Baseline Patient Demographics and Clinicopathologic Characteristics per ERBB2 Immunohistochemistry Results.** P-values are listed for a chi-squared test for categorical variables and a two-sided t-test for continuous variables. Abbreviations: ERBB2 = erb-b2 receptor tyrosine kinase 2. SD = standard deviation. ER = estrogen receptor. PR = progesterone receptor.

|                                       |                                               | Overall        | ERBB2 0       | ERBB2 1+      | ERBB2 2+      | P-Value |
|---------------------------------------|-----------------------------------------------|----------------|---------------|---------------|---------------|---------|
| <b>n</b>                              |                                               | 1136016        | 392246        | 548293        | 195477        |         |
| <b>Age, n (%)</b>                     | <b>&lt; 40</b>                                | 46482 (4.1)    | 17581 (4.5)   | 20620 (3.8)   | 8281 (4.2)    | <0.001  |
|                                       | <b>40 - 49</b>                                | 158040 (13.9)  | 55541 (14.2)  | 74976 (13.7)  | 27523 (14.1)  |         |
|                                       | <b>50 - 59</b>                                | 255811 (22.5)  | 88438 (22.5)  | 123304 (22.5) | 44069 (22.5)  |         |
|                                       | <b>60 - 69</b>                                | 326651 (28.8)  | 111515 (28.4) | 159406 (29.1) | 55730 (28.5)  |         |
|                                       | <b>70 - 79</b>                                | 237176 (20.9)  | 81558 (20.8)  | 115678 (21.1) | 39940 (20.4)  |         |
|                                       | <b>≥ 80</b>                                   | 111856 (9.8)   | 37613 (9.6)   | 54309 (9.9)   | 19934 (10.2)  |         |
| <b>Sex, n (%)</b>                     | <b>Female</b>                                 | 1125645 (99.1) | 389318 (99.3) | 543013 (99.0) | 193314 (98.9) | <0.001  |
|                                       | <b>Male</b>                                   | 10371 (0.9)    | 2928 (0.7)    | 5280 (1.0)    | 2163 (1.1)    |         |
| <b>Race / Ethnicity, n (%)</b>        | <b>Asian</b>                                  | 41619 (3.7)    | 14112 (3.6)   | 19473 (3.6)   | 8034 (4.1)    | <0.001  |
|                                       | <b>Hispanic</b>                               | 62985 (5.6)    | 24536 (6.3)   | 27978 (5.1)   | 10471 (5.4)   |         |
|                                       | <b>Native American</b>                        | 3242 (0.3)     | 972 (0.2)     | 1634 (0.3)    | 636 (0.3)     |         |
|                                       | <b>Non-Hispanic Black</b>                     | 126977 (11.3)  | 47194 (12.1)  | 58236 (10.7)  | 21547 (11.1)  |         |
|                                       | <b>Non-Hispanic White</b>                     | 886131 (78.6)  | 299961 (77.1) | 433984 (79.8) | 152186 (78.5) |         |
|                                       | <b>Other</b>                                  | 5737 (0.5)     | 2217 (0.6)    | 2614 (0.5)    | 906 (0.5)     |         |
| <b>Facility Type, n (%)</b>           | <b>Academic / Research</b>                    | 333794 (30.6)  | 127586 (34.1) | 150347 (28.5) | 55861 (29.8)  | <0.001  |
|                                       | <b>Community Cancer Program</b>               | 78218 (7.2)    | 26174 (7.0)   | 39368 (7.5)   | 12676 (6.8)   |         |
|                                       | <b>Comprehensive Community Cancer Program</b> | 450549 (41.4)  | 146217 (39.0) | 225667 (42.8) | 78665 (42.0)  |         |
|                                       | <b>Integrated Network Cancer Program</b>      | 226973 (20.8)  | 74688 (19.9)  | 112291 (21.3) | 39994 (21.4)  |         |
| <b>Charlson/Deyo Score, n (%)</b>     | <b>0</b>                                      | 931623 (82.0)  | 322257 (82.2) | 449731 (82.0) | 159635 (81.7) | <0.001  |
|                                       | <b>≥ 1</b>                                    | 204393 (18.0)  | 69989 (17.8)  | 98562 (18.0)  | 35842 (18.3)  |         |
| <b>Grade, n (%)</b>                   | <b>1</b>                                      | 284050 (26.1)  | 91339 (24.4)  | 151338 (28.8) | 41373 (22.0)  | <0.001  |
|                                       | <b>2</b>                                      | 514099 (47.3)  | 167171 (44.6) | 250798 (47.8) | 96130 (51.2)  |         |
|                                       | <b>3</b>                                      | 289022 (26.6)  | 115949 (31.0) | 122660 (23.4) | 50413 (26.8)  |         |
| <b>Histologic Subtype, n (%)</b>      | <b>Ductal</b>                                 | 883090 (77.7)  | 296283 (75.5) | 427789 (78.0) | 159018 (81.3) | <0.001  |
|                                       | <b>Ductal and Lobular</b>                     | 60000 (5.3)    | 20430 (5.2)   | 29711 (5.4)   | 9859 (5.0)    |         |
|                                       | <b>Inflammatory</b>                           | 1758 (0.2)     | 677 (0.2)     | 760 (0.1)     | 321 (0.2)     |         |
|                                       | <b>Lobular</b>                                | 132380 (11.7)  | 48657 (12.4)  | 64483 (11.8)  | 19240 (9.8)   |         |
|                                       | <b>Medullary</b>                              | 1461 (0.1)     | 734 (0.2)     | 571 (0.1)     | 156 (0.1)     |         |
|                                       | <b>Metaplastic</b>                            | 6236 (0.5)     | 3989 (1.0)    | 1789 (0.3)    | 458 (0.2)     |         |
|                                       | <b>Mucinous</b>                               | 22457 (2.0)    | 10410 (2.7)   | 9695 (1.8)    | 2352 (1.2)    |         |
|                                       | <b>Others</b>                                 | 18347 (1.6)    | 7706 (2.0)    | 7839 (1.4)    | 2802 (1.4)    |         |
|                                       | <b>Paget Disease</b>                          | 610 (0.1)      | 181 (0.0)     | 288 (0.1)     | 141 (0.1)     |         |
|                                       | <b>Papillary</b>                              | 3049 (0.3)     | 1057 (0.3)    | 1551 (0.3)    | 441 (0.2)     |         |
|                                       | <b>Sarcoma</b>                                | 230 (0.0)      | 156 (0.0)     | 60 (0.0)      | 14 (0.0)      |         |
|                                       | <b>Tubular</b>                                | 6398 (0.6)     | 1966 (0.5)    | 3757 (0.7)    | 675 (0.3)     |         |
| <b>T Stage, n (%)</b>                 | <b>0</b>                                      | 2924 (0.3)     | 1165 (0.3)    | 1346 (0.3)    | 413 (0.2)     | <0.001  |
|                                       | <b>1</b>                                      | 677942 (65.2)  | 230180 (64.3) | 336525 (66.9) | 111237 (62.5) |         |
|                                       | <b>2</b>                                      | 284172 (27.3)  | 99427 (27.8)  | 131739 (26.2) | 53006 (29.8)  |         |
|                                       | <b>3</b>                                      | 52152 (5.0)    | 19408 (5.4)   | 23600 (4.7)   | 9144 (5.1)    |         |
|                                       | <b>4</b>                                      | 21914 (2.1)    | 7857 (2.2)    | 9803 (1.9)    | 4254 (2.4)    |         |
| <b>N Stage, n (%)</b>                 | <b>0</b>                                      | 723240 (72.2)  | 251448 (72.8) | 351896 (72.6) | 119896 (69.8) | <0.001  |
|                                       | <b>1</b>                                      | 216005 (21.6)  | 72358 (21.0)  | 103481 (21.3) | 40166 (23.4)  |         |
|                                       | <b>2</b>                                      | 40267 (4.0)    | 13564 (3.9)   | 19078 (3.9)   | 7625 (4.4)    |         |
|                                       | <b>3</b>                                      | 22208 (2.2)    | 7812 (2.3)    | 10252 (2.1)   | 4144 (2.4)    |         |
| <b>Stage Group, n (%)</b>             | <b>I</b>                                      | 678389 (59.7)  | 230618 (58.8) | 335842 (61.3) | 111929 (57.3) | <0.001  |
|                                       | <b>II</b>                                     | 309228 (27.2)  | 107907 (27.5) | 144990 (26.4) | 56331 (28.8)  |         |
|                                       | <b>III</b>                                    | 98683 (8.7)    | 35646 (9.1)   | 44789 (8.2)   | 18248 (9.3)   |         |
|                                       | <b>IV</b>                                     | 49716 (4.4)    | 18075 (4.6)   | 22672 (4.1)   | 8969 (4.6)    |         |
| <b>Bone Mets at Diagnosis, n (%)</b>  | <b>No</b>                                     | 1097880 (97.7) | 378662 (97.7) | 530617 (97.7) | 188601 (97.5) | <0.001  |
|                                       | <b>Yes</b>                                    | 26141 (2.3)    | 8899 (2.3)    | 12389 (2.3)   | 4853 (2.5)    |         |
| <b>Brain Mets at Diagnosis, n (%)</b> | <b>No</b>                                     | 1121087 (99.8) | 386395 (99.7) | 541719 (99.8) | 192973 (99.8) | <0.001  |
|                                       | <b>Yes</b>                                    | 2575 (0.2)     | 1024 (0.3)    | 1143 (0.2)    | 408 (0.2)     |         |
| <b>Liver Mets at Diagnosis, n (%)</b> | <b>No</b>                                     | 1116283 (99.3) | 384631 (99.3) | 539588 (99.4) | 192064 (99.3) | <0.001  |
|                                       | <b>Yes</b>                                    | 7463 (0.7)     | 2849 (0.7)    | 3291 (0.6)    | 1323 (0.7)    |         |
| <b>Lung Mets at Diagnosis, n (%)</b>  | <b>No</b>                                     | 1112823 (99.0) | 383552 (99.0) | 537906 (99.1) | 191365 (99.0) | <0.001  |
|                                       | <b>Yes</b>                                    | 10790 (1.0)    | 3882 (1.0)    | 4918 (0.9)    | 1990 (1.0)    |         |
| <b>ERBB2/CEP17 Ratio, mean (SD)</b>   |                                               | 1.3 (1.3)      | 1.3 (2.2)     | 1.3 (1.6)     | 1.3 (0.6)     | 0.001   |
| <b>ERBB2 Copies, mean (SD)</b>        |                                               | 2.7 (4.2)      | 2.4 (4.7)     | 2.6 (4.5)     | 2.9 (3.7)     | <0.001  |
| <b>Receptor Status, n (%)</b>         | <b>ER+PR+</b>                                 | 856039 (75.8)  | 269903 (69.2) | 434346 (79.7) | 151790 (78.2) | <0.001  |
|                                       | <b>ER+PR-</b>                                 | 109383 (9.7)   | 38144 (9.8)   | 50464 (9.3)   | 20775 (10.7)  |         |

|                                     |                               |               |               |               |               |        |
|-------------------------------------|-------------------------------|---------------|---------------|---------------|---------------|--------|
|                                     | <b>ER-PR+</b>                 | 9559 (0.8)    | 4201 (1.1)    | 4001 (0.7)    | 1357 (0.7)    |        |
|                                     | <b>ER-PR-</b>                 | 153818 (13.6) | 77693 (19.9)  | 55901 (10.3)  | 20224 (10.4)  |        |
| <b>ER (% Positive), mean (SD)</b>   |                               | 78.1 (35.2)   | 70.8 (40.2)   | 82.7 (30.8)   | 82.0 (31.9)   | <0.001 |
| <b>PR (% Positive), mean (SD)</b>   |                               | 53.9 (40.8)   | 49.8 (42.2)   | 57.9 (39.6)   | 52.4 (39.9)   | <0.001 |
| <b>Ki67 (% Positive), mean (SD)</b> |                               | 24.6 (26.8)   | 27.6 (30.1)   | 22.3 (25.2)   | 24.1 (22.4)   | <0.001 |
| <b>OncotypeDx Score, n (%)</b>      | <b>High (26+)</b>             | 35287 (12.5)  | 10734 (12.4)  | 16594 (11.7)  | 7959 (14.7)   | <0.001 |
|                                     | <b>Intermediate (11 - 25)</b> | 176469 (62.5) | 53496 (61.6)  | 88775 (62.7)  | 34198 (63.3)  |        |
|                                     | <b>Low (0 - 10)</b>           | 70673 (25.0)  | 22675 (26.1)  | 36127 (25.5)  | 11871 (22.0)  |        |
| <b>Chemotherapy, n (%)</b>          | <b>Chemotherapy</b>           | 386952 (34.5) | 144168 (37.2) | 172816 (31.9) | 69968 (36.2)  | <0.001 |
|                                     | <b>No Chemo</b>               | 735429 (65.5) | 243244 (62.8) | 368948 (68.1) | 123237 (63.8) |        |
| <b>Hormonal Therapy, n (%)</b>      | <b>Hormonal Therapy</b>       | 813107 (73.3) | 258075 (67.4) | 407531 (76.1) | 147501 (77.2) | <0.001 |
|                                     | <b>No Hormonal Therapy</b>    | 296554 (26.7) | 124931 (32.6) | 127954 (23.9) | 43669 (22.8)  |        |

**eTable 2. Sites of Metastatic Disease in ERBB2-Negative Versus ERBB2-Low cancers.** Adjusted odds ratio is listed for a multivariable logistic regression including age, sex, comorbidity score, facility type, race / ethnicity, grade, histologic subtype, and quantitative receptor status for prediction of presence of metastasis at diagnosis for indicated site among patients with Stage IV disease. Imputation was used for missing values. Abbreviations: ERBB2 = erb-b2 receptor tyrosine kinase 2.

| <b>Metastatic Site</b> | <b>n ERBB2-Negative</b> | <b>n ERBB2-Low</b> | <b>Adjusted OR (95% CI)</b> | <b>p</b> |
|------------------------|-------------------------|--------------------|-----------------------------|----------|
| Brain                  | 13,248                  | 24,114             | 0.88 (0.81 - 0.96)          | 0.002    |
| Lung                   | 13,263                  | 24,050             | 1.00 (0.95 – 1.05)          | 0.93     |
| Liver                  | 13,309                  | 24,137             | 0.95 (0.90 – 1.00)          | 0.06     |
| Bone                   | 13,390                  | 24,331             | 1.02 (0.97 – 1.07)          | 0.35     |

**eTable 3. Baseline Patient Demographics and Clinicopathologic Characteristics of Patients Treated With Neoadjuvant Chemotherapy.** P-values are listed for a chi-squared test for categorical variables and a two-sided t-test for continuous variables. Abbreviations: ERBB2 = erb-b2 receptor tyrosine kinase 2. SD = standard deviation. ER = estrogen receptor. PR = progesterone receptor.

|                              |                                        | Missing | Overall       | ERBB2-Negative | ERBB2-Low    | p-Value   |
|------------------------------|----------------------------------------|---------|---------------|----------------|--------------|-----------|
| n                            |                                        |         | 109588        | 44019          | 65569        |           |
| Age, n (%)                   | < 40                                   | 0       | 15665 (14.3)  | 6716 (15.3)    | 8949 (13.6)  | <0.001    |
|                              | 40 - 49                                |         | 26946 (24.6)  | 11098 (25.2)   | 15848 (24.2) |           |
|                              | 50 - 59                                |         | 31534 (28.8)  | 12487 (28.4)   | 19047 (29.0) |           |
|                              | 60 - 69                                |         | 24871 (22.7)  | 9622 (21.9)    | 15249 (23.3) |           |
|                              | 70 - 79                                |         | 9314 (8.5)    | 3601 (8.2)     | 5713 (8.7)   |           |
|                              | ≥ 80                                   |         | 1258 (1.1)    | 495 (1.1)      | 763 (1.2)    |           |
| Sex, n (%)                   | Female                                 | 0       | 109003 (99.5) | 43829 (99.6)   | 65174 (99.4) | <0.001    |
|                              | Male                                   |         | 585 (0.5)     | 190 (0.4)      | 395 (0.6)    |           |
| Race / Ethnicity, n (%)      | Asian                                  | 874     | 4531 (4.2)    | 1721 (3.9)     | 2810 (4.3)   | <0.001    |
|                              | Hispanic                               |         | 9532 (8.8)    | 4126 (9.4)     | 5406 (8.3)   |           |
|                              | Native American                        |         | 390 (0.4)     | 126 (0.3)      | 264 (0.4)    |           |
|                              | Non-Hispanic Black                     |         | 20292 (18.7)  | 8649 (19.8)    | 11643 (17.9) |           |
|                              | Non-Hispanic White                     |         | 73274 (67.4)  | 28752 (65.8)   | 44522 (68.5) |           |
|                              | Other                                  |         | 695 (0.6)     | 302 (0.7)      | 393 (0.6)    |           |
| Facility Type, n (%)         | Academic / Research                    | 15665   | 32507 (34.6)  | 13672 (36.7)   | 18835 (33.3) | <0.001    |
|                              | Community Cancer Program               |         | 5519 (5.9)    | 2201 (5.9)     | 3318 (5.9)   |           |
|                              | Comprehensive Community Cancer Program |         | 35597 (37.9)  | 13514 (36.2)   | 22083 (39.0) |           |
|                              | Integrated Network Cancer Program      |         | 20300 (21.6)  | 7916 (21.2)    | 12384 (21.9) |           |
| Charlson/Deyo Score, n (%)   | 0                                      | 0       | 94226 (86.0)  | 37855 (86.0)   | 56371 (86.0) | 0.914     |
|                              | ≥ 1                                    |         | 15362 (14.0)  | 6164 (14.0)    | 9198 (14.0)  |           |
| Grade, n (%)                 | 1                                      | 5645    | 6051 (5.8)    | 1929 (4.6)     | 4122 (6.6)   | <0.001    |
|                              | 2                                      |         | 34191 (32.9)  | 11269 (27.0)   | 22922 (36.9) |           |
|                              | 3                                      |         | 63701 (61.3)  | 28599 (68.4)   | 35102 (56.5) |           |
| Histologic Subtype, n (%)    | Ductal                                 | 0       | 93344 (85.2)  | 37657 (85.5)   | 55687 (84.9) | <0.001    |
|                              | Ductal and Lobular Inflammatory        |         | 3765 (3.4)    | 1343 (3.1)     | 2422 (3.7)   |           |
|                              | Lobular                                |         | 821 (0.7)     | 331 (0.8)      | 490 (0.7)    |           |
|                              | Medullary                              |         | 7512 (6.9)    | 2651 (6.0)     | 4861 (7.4)   |           |
|                              | Medullary                              |         | 135 (0.1)     | 72 (0.2)       | 63 (0.1)     |           |
|                              | Metaplastic                            |         | 1264 (1.2)    | 763 (1.7)      | 501 (0.8)    |           |
|                              | Mucinous                               |         | 409 (0.4)     | 128 (0.3)      | 281 (0.4)    |           |
|                              | Others                                 |         | 2137 (2.0)    | 1004 (2.3)     | 1133 (1.7)   |           |
|                              | Paget Disease                          |         | 41 (0.0)      | 12 (0.0)       | 29 (0.0)     |           |
|                              | Papillary                              |         | 99 (0.1)      | 25 (0.1)       | 74 (0.1)     |           |
|                              | Sarcoma                                |         | 30 (0.0)      | 20 (0.0)       | 10 (0.0)     |           |
|                              | Tubular                                |         | 31 (0.0)      | 13 (0.0)       | 18 (0.0)     |           |
|                              | T Stage, n (%)                         | 0       | 1601          | 442 (0.4)      | 200 (0.5)    | 242 (0.4) |
| 1                            |                                        |         | 20535 (19.0)  | 8527 (19.7)    | 12008 (18.6) |           |
| 2                            |                                        |         | 54626 (50.6)  | 22248 (51.3)   | 32378 (50.1) |           |
| 3                            |                                        |         | 20562 (19.0)  | 7913 (18.3)    | 12649 (19.6) |           |
| 4                            |                                        |         | 11822 (10.9)  | 4468 (10.3)    | 7354 (11.4)  |           |
| N Stage, n (%)               | 0                                      | 1510    | 45746 (42.3)  | 19833 (45.7)   | 25913 (40.1) | <0.001    |
|                              | 1                                      |         | 49153 (45.5)  | 18424 (42.4)   | 30729 (47.5) |           |
|                              | 2                                      |         | 7614 (7.0)    | 3028 (7.0)     | 4586 (7.1)   |           |
| Stage Group, n (%)           | 3                                      |         | 5565 (5.1)    | 2138 (4.9)     | 3427 (5.3)   |           |
|                              | I                                      | 0       | 13853 (12.6)  | 5858 (13.3)    | 7995 (12.2)  | <0.001    |
|                              | II                                     |         | 60115 (54.9)  | 24001 (54.5)   | 36114 (55.1) |           |
|                              | III                                    |         | 35620 (32.5)  | 14160 (32.2)   | 21460 (32.7) |           |
| ERBB2/CEP17 Ratio, mean (SD) |                                        | 73933   | 1.3 (1.3)     | 1.3 (2.2)      | 1.3 (1.0)    | 0.569     |
| ERBB2 Copies, mean (SD)      |                                        | 99407   | 2.8 (3.7)     | 2.5 (4.1)      | 2.9 (3.5)    | <0.001    |
| Receptor Status, n (%)       | ER+PR+                                 | 570     | 46742 (42.9)  | 13851 (31.6)   | 32891 (50.4) | <0.001    |
|                              | ER+PR-                                 |         | 12498 (11.5)  | 4448 (10.2)    | 8050 (12.3)  |           |
|                              | ER-PR+                                 |         | 2636 (2.4)    | 1145 (2.6)     | 1491 (2.3)   |           |
|                              | ER-PR-                                 |         | 47142 (43.2)  | 24361 (55.6)   | 22781 (34.9) |           |
| ER (% Positive), mean (SD)   |                                        | 77646   | 39.4 (45.1)   | 27.9 (41.5)    | 49.0 (45.7)  | <0.001    |
| PR (% Positive), mean (SD)   |                                        | 77649   | 24.0 (36.6)   | 17.2 (32.7)    | 29.7 (38.6)  | <0.001    |
| Ki67 (% Positive), mean (SD) |                                        | 92957   | 49.8 (34.8)   | 55.0 (37.8)    | 45.5 (31.5)  | <0.001    |
| OncotypeDx Score, n (%)      | High (26+)                             | 107025  | 1100 (42.9)   | 327 (44.2)     | 773 (42.4)   | 0.140     |
|                              | Intermediate (11 - 25)                 |         | 1243 (48.5)   | 339 (45.9)     | 904 (49.6)   |           |
|                              | Low (0 - 10)                           |         | 220 (8.6)     | 73 (9.9)       | 147 (8.1)    |           |
| Hormonal Therapy, n (%)      | Hormonal Therapy                       | 1510    | 55228 (51.1)  | 17173 (39.6)   | 38055 (58.9) | <0.001    |
|                              | No Hormonal Therapy                    |         | 52850 (48.9)  | 26242 (60.4)   | 26608 (41.1) |           |
| Pathologic Response          | Residual Disease                       | 2026    | 80599 (80.8)  | 30316 (76.4)   | 50283 (83.7) | <0.001    |
|                              | Pathologic Complete Response           |         | 19184 (19.2)  | 9372 (23.6)    | 9812 (16.3)  |           |



**eTable 4. Overall Survival Versus ERBB2 Immunohistochemistry Results, by Cancer Subtype and Stage.**

Adjusted hazard ratio is listed for a multivariable Cox proportional hazards model including age, sex comorbidity score, facility type, race / ethnicity, grade, histologic subtype, and quantitative estrogen and progesterone receptor status in the hormone receptor positive model, with imputation used for missing values. Abbreviations: ERBB2 = erb-b2 receptor tyrosine kinase 2. HR = hazard ratio. CI = confidence interval.

| <b>Triple Negative Breast Cancer</b> |                  |                   |                   |                                           |          |                                           |          |
|--------------------------------------|------------------|-------------------|-------------------|-------------------------------------------|----------|-------------------------------------------|----------|
| <b>Stage</b>                         | <b>n ERBB2 0</b> | <b>n ERBB2 1+</b> | <b>n ERBB2 2+</b> | <b>Adjusted HR, ERBB2 1+<br/>(95% CI)</b> | <b>p</b> | <b>Adjusted HR, ERBB2 2+<br/>(95% CI)</b> | <b>p</b> |
| 1                                    | 22662            | 17152             | 6185              | 1.02 (0.98 - 1.06)                        | 0.40     | 0.98 (0.93 - 1.04)                        | 0.54     |
| 2                                    | 23467            | 17911             | 6358              | 0.97 (0.94 - 1.0)                         | 0.03     | 0.89 (0.85 - 0.93)                        | < 0.001  |
| 3                                    | 8021             | 6281              | 2436              | 0.96 (0.92 - 1.00)                        | 0.06     | 0.86 (0.81 - 0.91)                        | < 0.001  |
| 4                                    | 3067             | 2237              | 791               | 0.94 (0.89 - 0.98)                        | 0.009    | 0.87 (0.81 - 0.93)                        | < 0.001  |
| <b>Hormone Receptor Positive</b>     |                  |                   |                   |                                           |          |                                           |          |
| 1                                    | 154377           | 246550            | 80685             | 1.01 (0.99 - 1.02)                        | 0.27     | 1.00 (0.99 - 1.02)                        | 0.78     |
| 2                                    | 63386            | 103504            | 40215             | 1.0 (0.98 - 1.02)                         | 0.87     | 0.98 (0.96 - 1.01)                        | 0.16     |
| 3                                    | 17998            | 28893             | 11637             | 0.98 (0.96 - 1.01)                        | 0.21     | 0.96 (0.93 - 0.99)                        | 0.01     |
| 4                                    | 8040             | 12726             | 5141              | 0.98 (0.96 - 1.01)                        | 0.20     | 0.93 (0.90 - 0.97)                        | < 0.001  |

**eTable 5. Sensitivity and Specificity for Prediction of ERBB2-Low Status Using Select Cutoffs for ERBB2**

**ISH Results.** Results are computed using n = 74,035 patients had dual probe ERBB2/CEP17 ratio results and n = 99,541 who had ERBB2 copy number results. Abbreviations: ERBB2 = erb-b2 receptor tyrosine kinase 2. ISH = in situ hybridization.

| ERBB2 Copy Number |                 |                 | ERBB2/CEP17 Ratio |                 |                 |
|-------------------|-----------------|-----------------|-------------------|-----------------|-----------------|
| Cutoff            | Sensitivity (%) | Specificity (%) | Cutoff            | Sensitivity (%) | Specificity (%) |
| 1                 | 98.8            | 4.1             | 1                 | 98.7            | 3.3             |
| 1.15              | 92.1            | 18.9            | 1.05              | 79.2            | 33.8            |
| 1.3               | 89              | 23              | 1.1               | 76              | 37.4            |
| 1.45              | 85.7            | 27.3            | 1.15              | 52.6            | 58.6            |
| 1.6               | 84.1            | 29.6            | 1.2               | 50.2            | 61.2            |
| 1.75              | 79.3            | 37              | 1.25              | 34.1            | 74.5            |
| 1.9               | 74.7            | 42.6            | 1.3               | 32.4            | 76.1            |
| 2.05              | 61.1            | 58.2            | 1.35              | 22.6            | 83.7            |
| 2.2               | 55.4            | 63.5            | 1.4               | 21.6            | 84.5            |
| 2.35              | 46.7            | 71.8            | 1.45              | 15.5            | 88.6            |
| 2.5               | 43.1            | 75.1            | 1.5               | 14.9            | 89.1            |
| 2.65              | 36.8            | 80.5            | 1.55              | 10.8            | 91.8            |
| 2.8               | 34.1            | 82.4            | 1.6               | 10.3            | 92.1            |
| 2.95              | 29              | 86.1            | 1.65              | 7.4             | 93.9            |
| 3.1               | 26.7            | 87.6            | 1.7               | 7.1             | 94.2            |
| 3.25              | 22.6            | 89.8            | 1.75              | 4.7             | 95.5            |
| 3.4               | 20.8            | 90.7            | 1.8               | 4.5             | 95.7            |
| 3.55              | 16.9            | 92.4            | 1.85              | 2.6             | 97.1            |
| 3.7               | 15              | 93.3            | 1.9               | 2.5             | 97.2            |
| 3.85              | 11.2            | 94.6            | 1.95              | 1.6             | 97.9            |
| 4                 | 9.6             | 95.4            | 2                 | 1.5             | 98              |
