# Supplementary material for: Clinicopathologic Characteristics and Prognosis of ERBB2-Low Breast Cancer Among Patients in the National Cancer Database
Source: PubMed Central journal article supplement (PMC9951099; doi:10.1001/jamaoncol.2022.7476), 2023-02-23
Supplement: jamaoncol-e227476-s002.pdf [file jamaoncol-e227476-s002.pdf]

## Data Sharing Statement

Peiffer. Demographic and Clinicopathological Characteristics and Prognosis of ERBB2-Low Breast Cancer Among Patients in the National Cancer Database. *JAMA Oncol.* Published February 23, 2023. doi:10.1001/jamaoncol.2022.7476

### Data

**Data available:** No

### Additional Information

**Explanation for why data not available:** The data collected for this study is maintained by the American Cancer Society / American College of Surgeons and can only be obtained through a direct request to those organizations.
